# Supplementary material
Source: publisher site journal article supplement (https://www.spandidos-publications.com/4188/downloadSupplementary)

Figure S1. Confirmation of *Ednrb* gene knockout. Extracted proteins from the tails of mice were subjected to western blot analysis. (A) Representative western blot image and (B) quantified expression levels. *Ednrb* protein expression in the *Ednrb*<sup>-/-</sup> mice was significantly decreased compared with the WT and heterozygous mice. \**P*<0.05 vs. WT and heterozygous. *Ednrb*, endothelin receptor B; WT, wild-type.

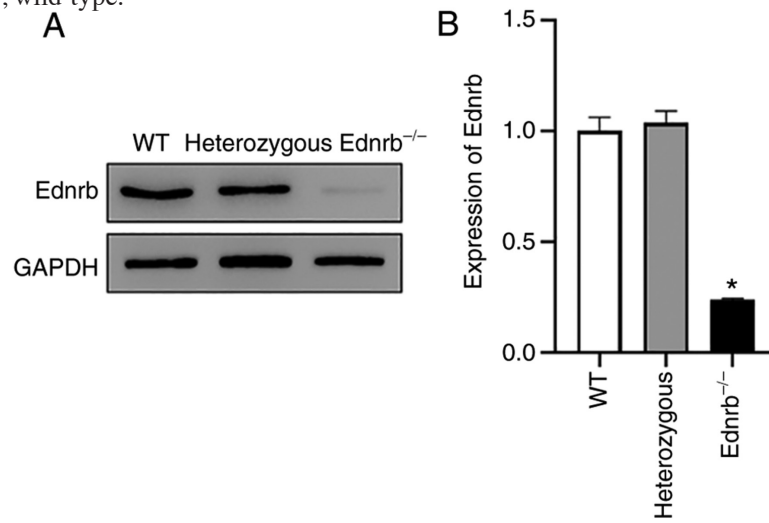

Supplement: Supplementary file 1 [file downloadSupplementary]
